# Supplementary material for: Severe delayed hemolytic transfusion reaction due to anti-Fy3 in a patient with sickle cell disease undergoing red cell exchange prior to hematopoietic progenitor cell collection for gene therapy
Source: PubMed Central journal article supplement — Haematologica. 2020 Aug 13;106(1):310–2. doi: 10.3324/haematol.2020.253229 (PMC7776235; doi:10.3324/haematol.2020.253229), 2020-08-13
Supplement: 2020_253229-Disclosures_Contributions.pdf [file 2020_253229-Disclosures_Contributions.pdf]

Haematologica  
HAEMATOL/2020/253229  
Version 3

Severe delayed hemolytic transfusion reaction due to anti-Fy3 in a patient with sickle cell disease undergoing red cell exchange prior to hematopoietic progenitor cell collection for gene therapy

Elizabeth F. Stone, Scott T. Avecilla, David L. Wuest, Christine Lomas-Francis, Connie M. Westhoff, David L. Diuguid, Michel Sadelain, Farid Boulad, and Patricia A. Shi

Disclosures: The authors declare no conflicts of interest.

Contributions: EFS and PAS wrote the manuscript; STA, DLW, DLD, FB, and PAS cared for the patient, CLF and CMW performed immunohematology studies, and all authors edited or reviewed the manuscript.
